# Supplementary material for: Over-Stretching Tolerant Conductors on Rubber Films by Inkjet-Printing Silver Nanoparticles for Wearables
Source: MDPI journal article supplement (doi:10.3390/polym10121413), 2018-12-19
Supplement: s1 [file s1]

# Supplementary Materials: Over-Stretching Tolerant Conductors on Rubber Films by Inkjet-Printing Silver Nanoparticles for Wearables

Andreas Albrecht, Marco Bobinger, José F. Salmerón, Markus Becherer, Gordon Cheng, Paolo Lugli and Almudena Rivedeneyra

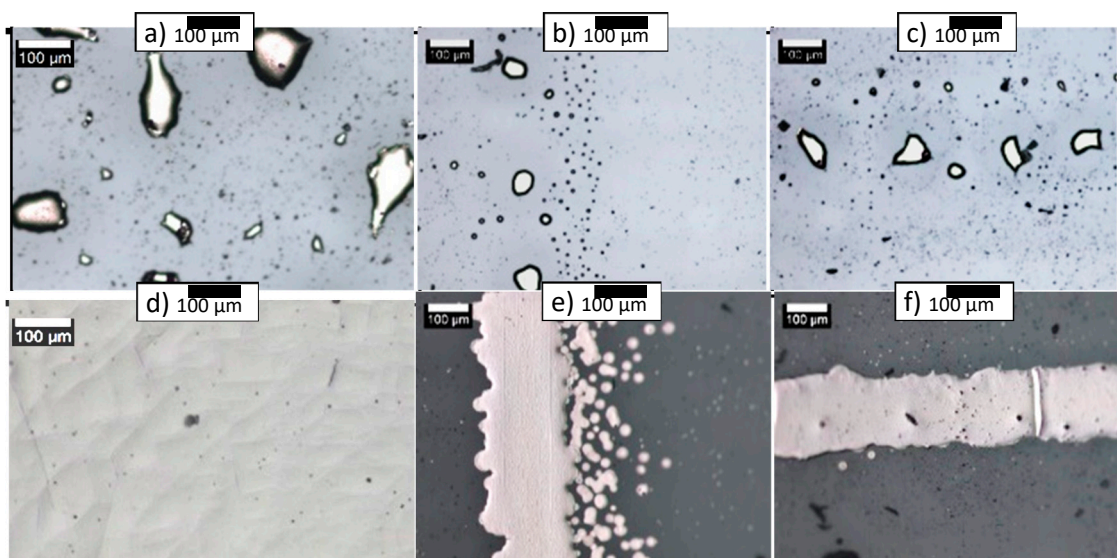

**Figure S1.** Inkjet-printed silver patterns on untreated silicone (a–c) and plasma-treated silicone (d–f). (a,d): printed areas larger than the image area, (b,e): printed vertical lines, (c,f): printed horizontal lines. The satellite drops in picture b and e result from inaccuracies of the cheap desktop inkjet printer [23].
